# Supplementary material
Source: PubMed Central journal article supplement (PMC8506346)
Supplement: mmc1.pdf [file mmc1.pdf]

**ANEXO 1. Cuestionario entrevistas telefónicas:**

1. ID: \_\_\_\_\_

Fecha: \_\_\_\_/\_\_\_\_/\_\_\_\_

Fecha inicio síntomas:

Fecha primera consulta en urgencias:

Fecha ingreso hospitalario y alta:

Tratamiento actual domiciliario:

|                            |    |    |                                         |
|----------------------------|----|----|-----------------------------------------|
| FIEBRE                     | SI | NO | Inicio ( _ / _ / _ ), Fin ( _ / _ / _ ) |
| RINORREA                   | SI | NO | Inicio ( _ / _ / _ ), Fin ( _ / _ / _ ) |
| DOLOR DE GARGANTA          | SI | NO | Inicio ( _ / _ / _ ), Fin ( _ / _ / _ ) |
| TOS                        | SI | NO | Inicio ( _ / _ / _ ), Fin ( _ / _ / _ ) |
| DISNEA                     | SI | NO | Inicio ( _ / _ / _ ), Fin ( _ / _ / _ ) |
| DIARREA                    | SI | NO | Inicio ( _ / _ / _ ), Fin ( _ / _ / _ ) |
| VÓMITOS                    | SI | NO | Inicio ( _ / _ / _ ), Fin ( _ / _ / _ ) |
| DOLOR ABDOMINAL            | SI | NO | Inicio ( _ / _ / _ ), Fin ( _ / _ / _ ) |
| CEFALEA                    | SI | NO | Inicio ( _ / _ / _ ), Fin ( _ / _ / _ ) |
| PÉRDIDA OLFATO/GUSTO       | SI | NO | Inicio ( _ / _ / _ ), Fin ( _ / _ / _ ) |
| ASTENIA                    | SI | NO | Inicio ( _ / _ / _ ), Fin ( _ / _ / _ ) |
| MIALGIAS                   | SI | NO | Inicio ( _ / _ / _ ), Fin ( _ / _ / _ ) |
| EXANTEMA                   | SI | NO | Inicio ( _ / _ / _ ), Fin ( _ / _ / _ ) |
| OTROS (especificar: _____) |    |    | Inicio ( _ / _ / _ ), Fin ( _ / _ / _ ) |

OTROS COMENTARIOS:

RECOMENDACIÓN:
